# Supplementary material for: Green and alcohol-free H2O2 generation paired with simultaneous contaminant treatment enabled by sulfur/cyano-modified g-C3N4 with efficient oxygen activation and proton adsorption
Source: Royal Society of Chemistry journal article supplement (doi:10.1039/d3gc04123a), 2024-01-01
Supplement: d3gc04123a1.pdf [file d3gc04123a1.pdf]

Electronic Supplementary Material (ESI) for Green Chemistry.  
This journal is © The Royal Society of Chemistry 2023

## Supplementary Material

### **Green and alcohol-free H<sub>2</sub>O<sub>2</sub> generation paired with simultaneous contaminant treatment enabled by sulfur/cyano-modified g-C<sub>3</sub>N<sub>4</sub> with efficient oxygen activation and proton adsorption**

Zijie Wang,<sup>a</sup> Jiaqi Wu,<sup>a</sup> Xiaoqiong Fan,<sup>a</sup> Yiwen Zhang,<sup>a</sup> Qing Xu,<sup>a</sup> Bocheng Qiu,<sup>b</sup> Liang Chen,<sup>\*a</sup>  
Xiaofei Zeng,<sup>\*a</sup> Qiaohong Zhu<sup>\*a</sup>

a. College of Material, Chemistry and Chemical Engineering, Key Laboratory of Organosilicon  
Chemistry and Material Technology, Ministry of Education, Hangzhou Normal University,  
Hangzhou, 311121, Zhejiang, China.

b. Jiangsu Key Laboratory of Pesticide Sciences, Department of Chemistry, College of Sciences,  
Nanjing Agricultural University, Nanjing 210095, China.

**Summary of the supporting information:** 27 pages, 5 Tables, and 18 Figures

## Chemical materials

Commercial reagents were utilized as received without additional purification. Melamine, thiourea, ethanol (EtOH, 99.99%), *n*-propanol (99.9%), *i*-propanol (HPLC), methanol (99.9%), *t*-butanol (99.9%), phemethylol (99.9%) were purchased from the National Pharmaceutical Company (China). 1,4-Benzoquinone (BQ, 98%), 2,3-dichloro-5,6-dicyano-1,4-benzoquinone (DDQ, 99%), 2,2,6,6-tetramethyl-1-piperidin-nyloxy (TEMPO, 98%), 2,2,6,6-tetramethylpi (TEMP, 98%) were supplied by Sigma-Aldrich Company. Methylene blue (MB, 99%), Rhodamine B (RhB, 99%), Methyl orange (MO, 99%) were purchased from Macklin Biochemical Company. Potassium hydroxide (KOH), hydrogen chloride (HCl) potassium chloride (KCl), potassium iodide (KI), sodium sulphate (Na<sub>2</sub>SO<sub>4</sub>), potassium ferricyanide (K<sub>3</sub>[Fe(CN)<sub>6</sub>]), potassium hexacyanoferrate (K<sub>4</sub>Fe(CN)<sub>6</sub>·3H<sub>2</sub>O), barium sulfate (BaSO<sub>4</sub>), silver nitrate (AgNO<sub>3</sub>) were obtained from Sinopharm Chemical Reagent Company. Deionized water was prepared by the Hitech laboratory water purification system (R = 18.25 kohm).

## The preparation of photocatalysts

**Synthesis of CN:** The mixture of melamine and thiourea in different proportions was placed in a crucible in a muffle furnace. Briefly, 9 g thiourea and 1 g melamine were mixed together in a lidded crucible, and was calcined at 550 °C for 4 h with a heating rate of 10 °C min<sup>-1</sup>, the final product was named as CN.

**Synthesis of MCN:** 10 g melamine was added to the flask, along with the addition of 30 mL KOH solution (26.67 g L<sup>-1</sup>) for dissolving, and the solution was transferred to a clean surface dish and was dried an oven at 120 °C. In this case, the dried powder was calcined at 550 °C for 4 h in a muffle furnace, the final product was named as MCN.

**Synthesis of TCN:** 10 g thiourea was added to the flask, along with the addition of 30 mL KOH solution (26.67 g L<sup>-1</sup>), and the solution was transferred to a clean surface dish and was dried an oven at 120 °C. The dried powder was calcined at 550 °C for 4 h in a muffle furnace, the final product was named as TCN.

**Synthesis of MTCN:** Melamine and thiourea (10 g) were added to the flask at a certain mass ratio (1/9, 3/7, 5/5, 7/3, 9/1), with the addition of 30 mL KOH solution (26.67 g L<sup>-1</sup>) for dissolving, and the solution was transferred to a clean surface dish and was dried an oven at 120 °C. In this case, the dried powder was calcined at 550 °C for 4 h in a muffle furnace.

## The photocatalytic reduction of O<sub>2</sub> into H<sub>2</sub>O<sub>2</sub>

In a typical reaction, 25 mg photocatalyst was dispersed in a mixed solution containing 45 mL H<sub>2</sub>O and 5 mL sacrificial agent (e.g. ethanol, *n*-propanol, *i*-propanol, methanol, *t*-butanol, phemethylol) in a quartz tube, with dark adsorption for 20 min to ensure the adsorption-desorption equilibrium. The pH was adjusted to specific values varying from 3 to 11 using 0.1 M NaOH and HCl. Following that, the reaction solution was irradiated with a 300 W xenon lamp equipped with AM 1.5 or cut 420 filter as the simulated light source. Samples are taken at regular intervals and was treated with a 0.22 μm filter for the measurement of H<sub>2</sub>O<sub>2</sub> generation.

Free radical capture experiments were conducted to explore the existing radicals in the reaction. Add the radical capture agents (*p*-BQ, TEMP, TEMPO, DDQ) to capture superoxide radicals (·O<sub>2</sub><sup>-</sup>), singlet oxygen (<sup>1</sup>O<sub>2</sub>), hydroxyl radicals (·OH) and electrons (e<sup>-</sup>). In a typical reaction, 25 mg photocatalyst and 0.3 mmol free radical capture agents were added into a mixed solution containing 45 mL H<sub>2</sub>O and 5 mL sacrificial agent (e.g. ethanol, *n*-propanol, *i*-propanol, methanol, *t*-butanol, phemethylol) in a quartz tube, with dark adsorption for 20 min to ensure the adsorption-desorption equilibrium. Following that, the reaction solution was irradiated with a 300 W xenon lamp equipped with AM 1.5 filter as the simulated light source. Samples are taken at regular intervals and was treated with a 0.22 μm filter for the measurement of H<sub>2</sub>O<sub>2</sub> generation.

## H<sub>2</sub>O<sub>2</sub> quantification methods

Iodine dosimetry was employed to study the H<sub>2</sub>O<sub>2</sub> generation in this system, based on a standard curve detected using Ultraviolet-visible (UV-vis) spectroscopy. In a typical procedure, 500 μL filtrate, 50 μL of (NH<sub>4</sub>)<sub>6</sub>MoO<sub>24</sub>·4H<sub>2</sub>O (0.01 M), and 2000 μL of KI solution (0.1 M) were mixed together, and the absorbance of the sample at 350 nm was determined with UV-vis spectroscopy after standing for 30 s.

## Photocatalytic H<sub>2</sub>O<sub>2</sub> generation and pollutants degradation

In a typical reaction, 25 mg photocatalyst was dispersed in a solution (with the concentration of RhB of 100 mg L<sup>-1</sup>) in a quartz tube, with dark adsorption for 20 min to ensure the adsorption-desorption equilibrium. The pH was adjusted to specific values varying from 3 to 11 using 0.1 M NaOH and HCl.

Following that, the reaction solution was irradiated with a 300 W xenon lamp equipped with AM 1.5 as the simulated light source. Samples are taken at regular intervals and was treated with a 0.22  $\mu\text{m}$  filter for the measurement of  $\text{H}_2\text{O}_2$  generation.

Free radical capture experiments were conducted to explore the existing radicals in the reaction. Add the radical capture agents (*p*-BQ, TEMP, TEMPO, DDQ) to capture superoxide radicals ( $\cdot\text{O}_2^-$ ), singlet oxygen ( $^1\text{O}_2$ ), hydroxyl radicals ( $\cdot\text{OH}$ ) and electrons ( $e^-$ ). In a typical reaction, 25 mg photocatalyst and 0.3 mol free radical capture agents were dispersed in 50 mL solution (with the concentration of RhB: 100  $\text{mg L}^{-1}$ ) in a quartz tube, with dark adsorption for 20 min to ensure the adsorption-desorption equilibrium. Following that, the reaction solution was irradiated with a 300 W xenon lamp equipped with AM 1.5 filter as the simulated light source. Samples were taken at regular intervals and was treated with a 0.22  $\mu\text{m}$  filter for the measurement of  $\text{H}_2\text{O}_2$  generation.

### Characterizations

The crystalline structures of samples were determined by X-ray diffraction (XRD, RigakuD/MAX 2550) patterns with Cu  $\text{K}\alpha$  radiation source. The Fourier transform infrared (FTIR, Nicolet Magna 550) and the X-ray photoelectron spectroscopy (XPS, Perkin-Elmer PHI 5000C ESCA) were applied to detect the characteristic groups and the change of chemical bonds of samples. The solid-state  $^{13}\text{C}$  NMR spectra of the sample was tested by German Bruker 500M standard cavity CP MAS probe-BL4. The microstructure of samples was characterized by transmission electron microscope (TEM, JEM-1400), high-resolution transmission electron microscope (HRTEM, JEM-2100) and scanning electron microscope (SEM, S-4800) image. The thickness of the samples was investigated by a nano-scale atomic force microscope (AFM, E-Sweep, Seiko, Japan). The room temperature electron paramagnetic resonance (EPR) spectroscopy was performed on JES X320 spectrometer. The ultraviolet-visible (UV-vis) spectra were carried out through a spectrophotometer (UV-5100B) furnished with an integrating sphere assembly. And the light absorption ability of samples was got from a Scan ultraviolet visible (UV-vis) spectrophotometer (UV-2400), with  $\text{BaSO}_4$  as the reflectance sample. The photoluminance spectra of the samples were tested at room temperature excited by an incident light of 350 nm by using a spectrofluorophotometer (Shimadzu, RF-5301). Steady and time-resolved fluorescence emission spectra were recorded at room temperature with a fluorescence spectrophotometer (Edinburgh Instruments, FLSP-920). Electrochemical and photoelectrochemical analyses were performed by an electrochemical workstation (CHI660E) in a three-electrode setup. The Pt plate electrode was used as a counter electrode, Ag/AgCl electrode was applied as the reference electrode, and Indium Tin Oxide (ITO) covered with different materials was denoted as the working electrode. Transient photocurrent and Mott-Schottky curve measurements were performed with 0.5 M  $\text{Na}_2\text{SO}_4$  as an electrolyte, electrochemical impedance spectroscopy (EIS) measurements were performed with 25 mM  $\text{K}_3[\text{Fe}(\text{CN})_6]$ , 25 mM  $\text{K}_4[\text{Fe}(\text{CN})_6]$  and 0.1 M KCl mixed aqueous solution as the electrolyte, linear sweep voltammetry (LSV) measurements were performed with 1 mM  $\text{K}_3[\text{Fe}(\text{CN})_6]$  and 1 M KCl mixed aqueous solution as the electrolyte.

### Measurements and calculations of AQY

The apparent quantum yield (AQY) of photocatalytic  $\text{H}_2\text{O}_2$  generation was measured under the similar photocatalytic reaction condition except for the light source. The light source was 300 W Xenon lamp equipped with monochromatic mass filter at 365, 420, 475, and 520 nm, respectively, with an irradiation time of 1 h.

The AQY was calculated using the equation (1) and (2)

$$AQY = \frac{2 \times H_2O_2 \text{ formed (mol)}}{\text{the number of incident photons (mol)}} \times 100\% \quad (1)$$

$$\text{The number of incident photons (mol)} = \frac{E\lambda}{h\nu} \times 100\% \quad (2)$$

where E,  $\lambda$ , h and  $\nu$  represent the energy absorbed by Xenon lamp (Light intensity = 13.12  $\text{mW cm}^{-2}$ , the irradiated area = 1.69  $\text{cm}^2$ , and the irradiation time = 3600 s), the wavelength of the light (365 nm, 420 nm, 475 nm, 520 nm), Planck constant ( $6.626 \times 10^{-34}$  J s) and speed of light ( $3 \times 10^8$   $\text{m s}^{-1}$ )

### Theoretical calculations

In this work, vienna ab-initio Simulation Package (VASP) was applied for density functional theory (DFT) calculations. The description of core-valance electron interaction adopted Projected Augmented Wave (PAW) method.<sup>1,2</sup> Generalized-gradient approximation (GGA) of Perdew-Burke-Ernzerhof (PBE) functional form was introduced to handle the electron exchange and correlation effects.<sup>3,4</sup> Monkhorst-Pack grid of 2×2×1 was employed for calculation. Energy cutoff of 400 eV for plane-wave basis was set to ensure the computational precision. Meanwhile, vacuum layer with 20 Å were applied in all slab models to avoid the vertical interactions between C<sub>3</sub>N<sub>4</sub> monolayer. The atomic positions were fully relaxed until each atom's remaining force was less than 0.05 eV/Å. For the adsorption over substrate, long-range van der Waals interaction was simulated with the DFT-D3 method.<sup>5</sup> The proton-coupled electron transferring was calculated via the computational hydrogen electrode (CHE) mode. The steps for O<sub>2</sub> hydrogenation to produce H<sub>2</sub>O<sub>2</sub> were illustrated according to eqs. (3)-(6):

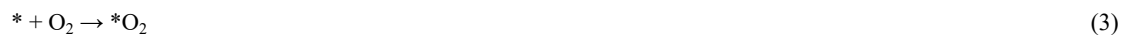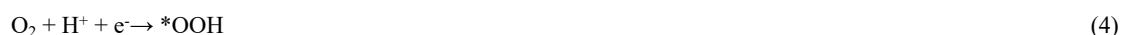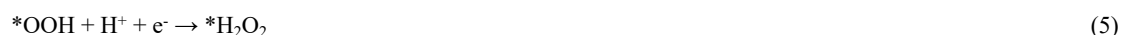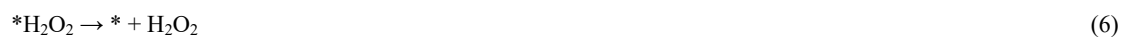

During which, gibbs free energies (G) were defined by eq. (7):

$$G = \text{EDFT} + \text{EZPE} - \text{TS} \quad (7)$$

where EDFT, EZPE and TS are the electronic energy, zero-point energy and entropy, respectively. All gibbs free energies for comparison were given at 298.15 K.

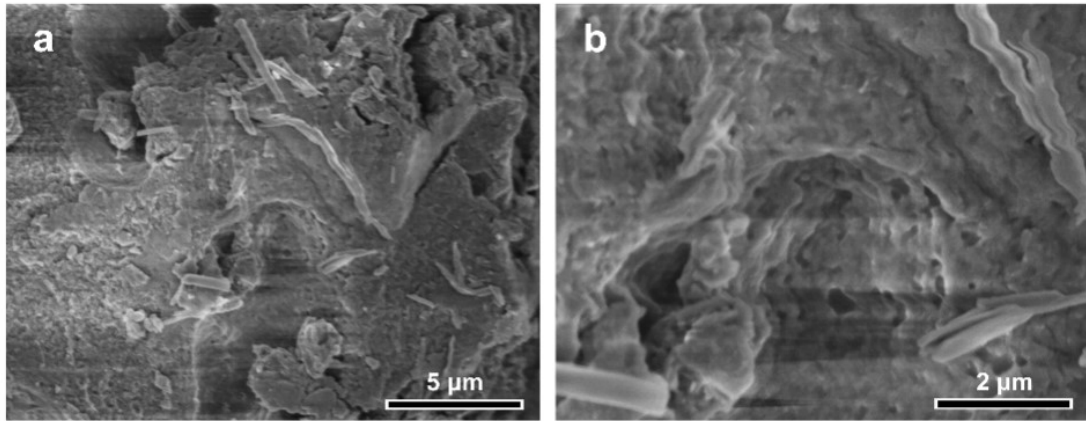

**Figure S1.** SEM images of CN.

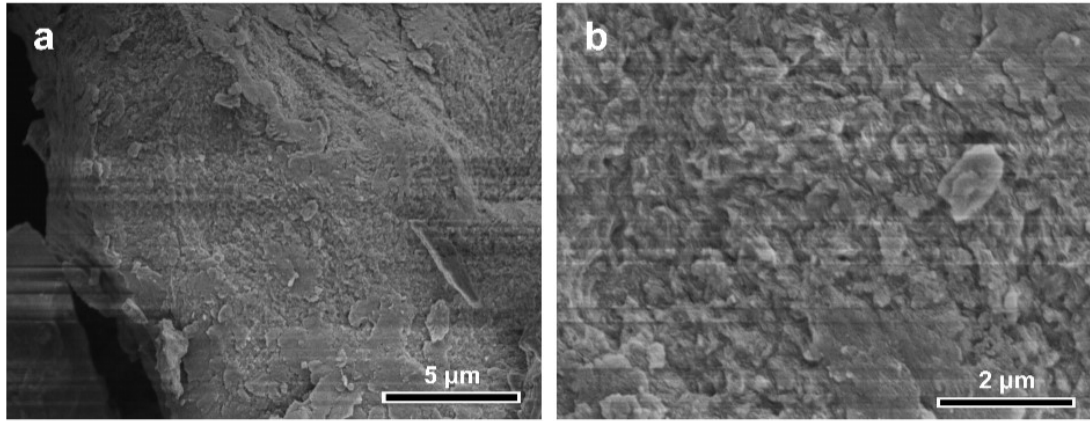

**Figure S2.** SEM images of MCN.

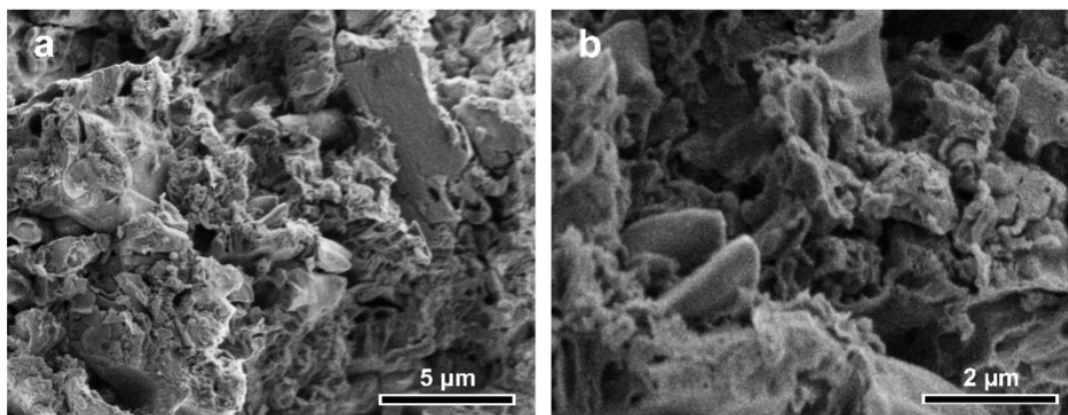

**Figure S3.** SEM images of TCN.

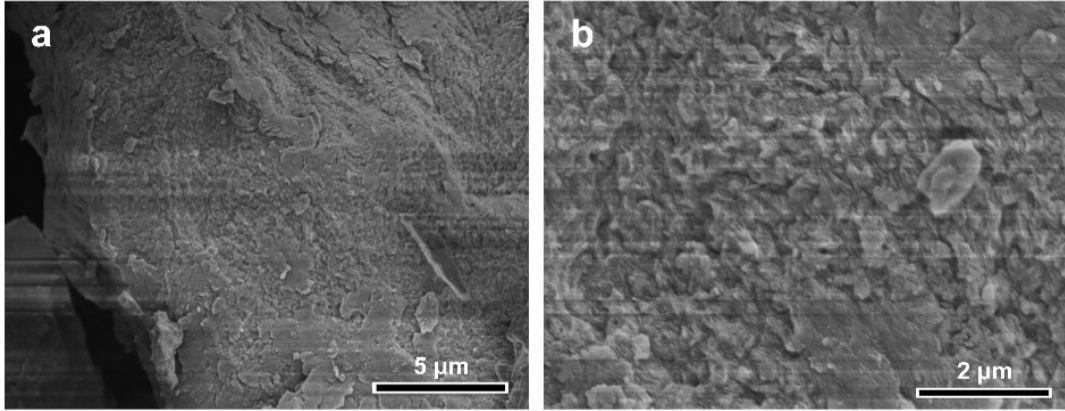

**Figure S4.** SEM images of MTCN.



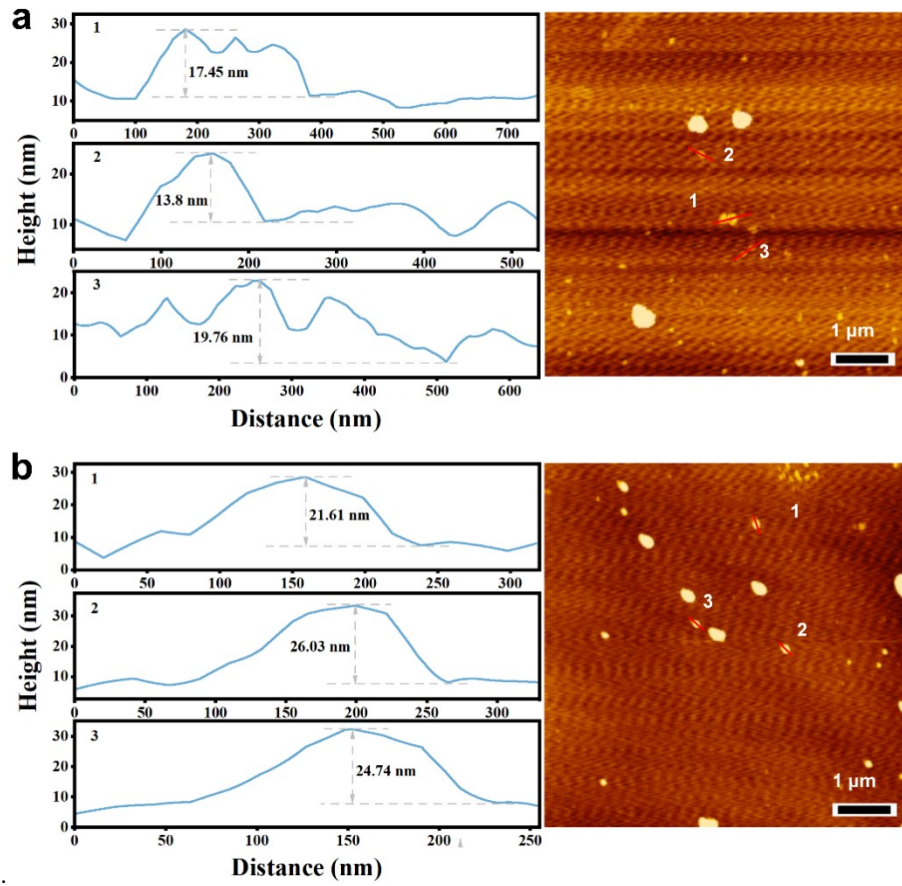

**Figure S5.** AFM images of (a) CN and (b) MTCN.

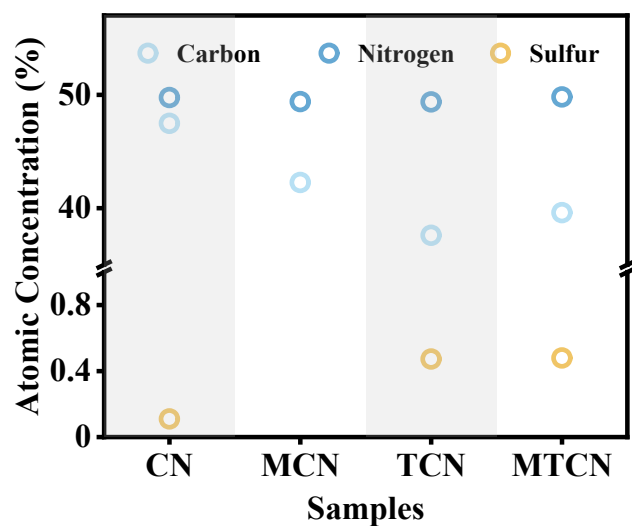

Figure S6. The proportion of elements in samples determined by XPS.

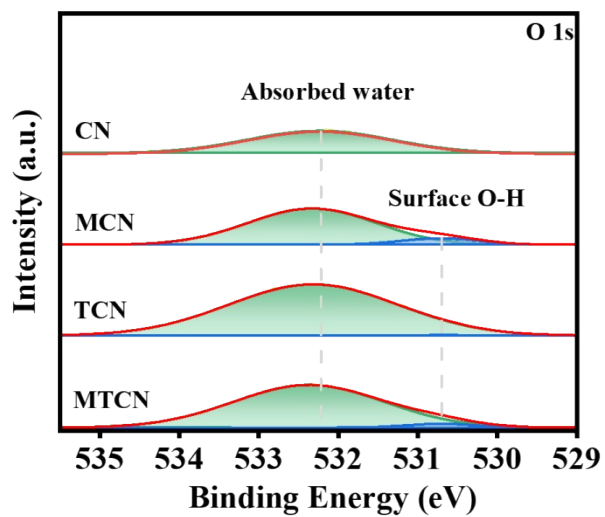

**Figure S7.** O 1s XPS spectra.

The O 1s spectrum exhibits two peaks at around 530.80 and 532.46 eV, corresponding to absorbed water and surface adsorbed O-H,<sup>6,7</sup> which may contribute to the residue of water and alkali during sample treatment.

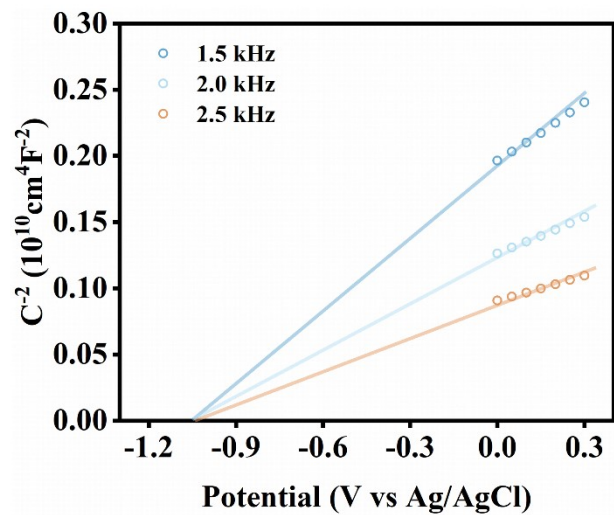

Figure S8. Mott-Schottky plots of CN.

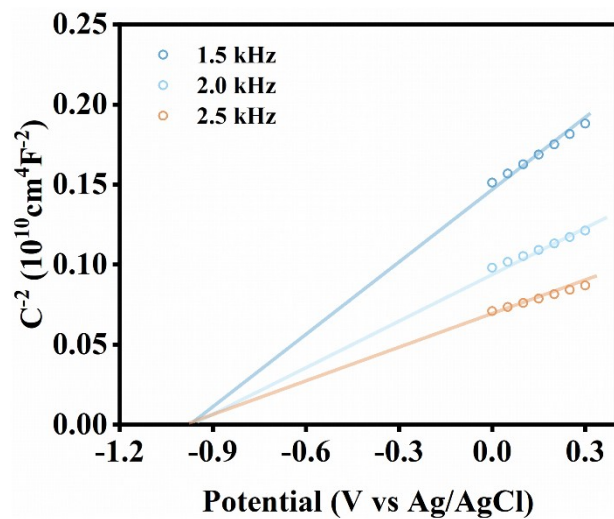

Figure S9. Mott-Schottky plots of MCN.

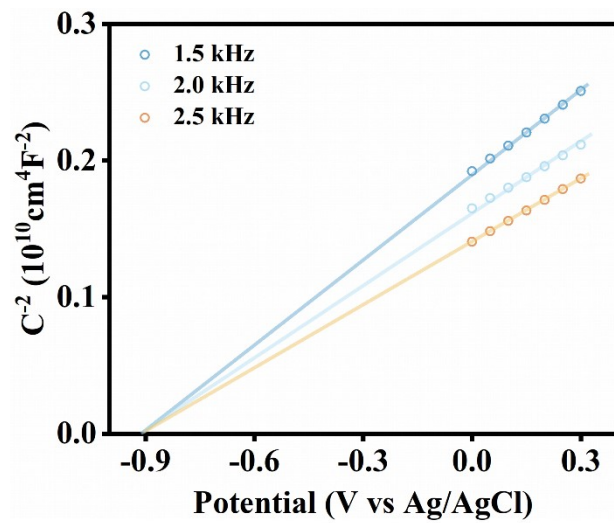

Figure S10. Mott-Schottky plots of TCN.

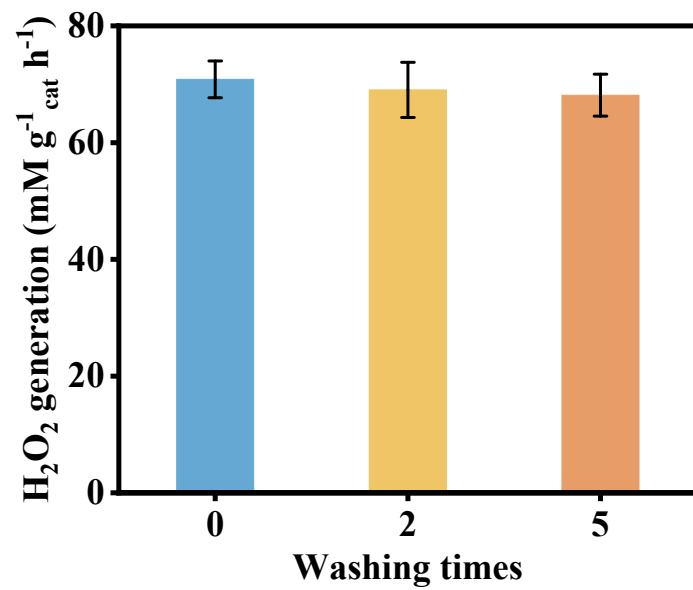

**Figure S11.** Comparison of H<sub>2</sub>O<sub>2</sub> generation of MTCN with varying washing times.

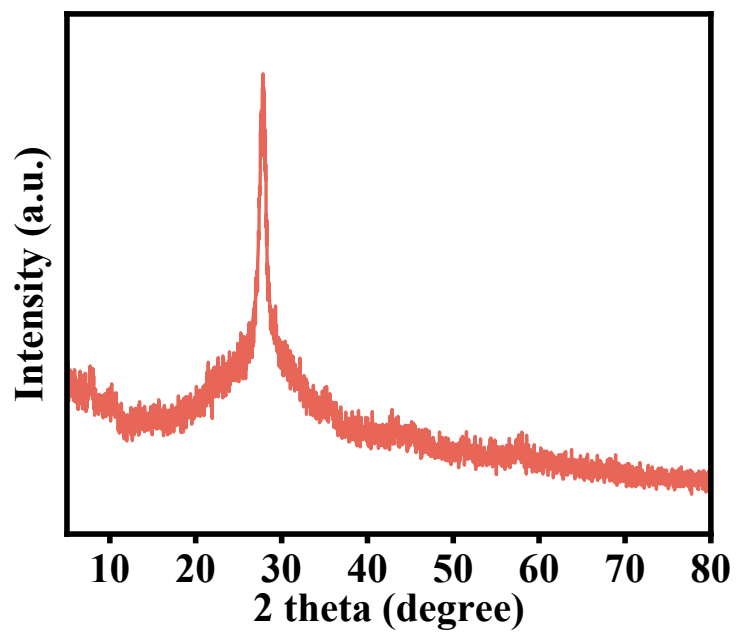

**Figure S12.** XRD pattern of MTCN after 10 cycles.



**Figure S13.** TEM image of MTCN after 10 cycles.

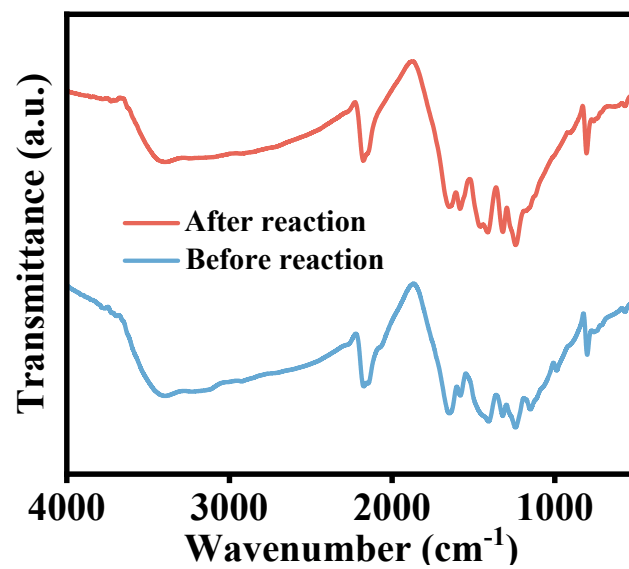

Figure S14. FTIR spectra of MTCN after 10 cycles.

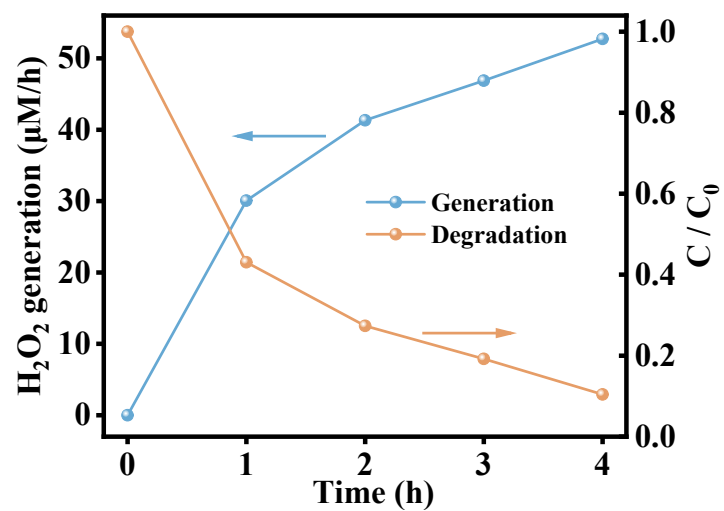

Figure S15. The scale-up reaction of in-situ H<sub>2</sub>O<sub>2</sub> generation and organic pollutants over MTCN.

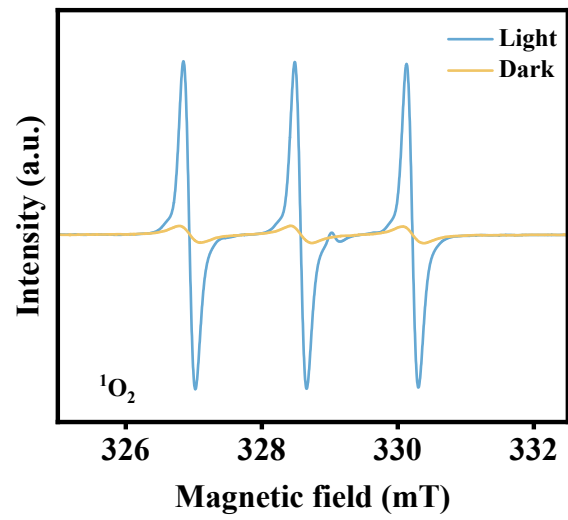

**Figure S16.** EPR spectra of  $^1\text{O}_2$  of  $\text{H}_2\text{O}_2$  generation of MTCN.

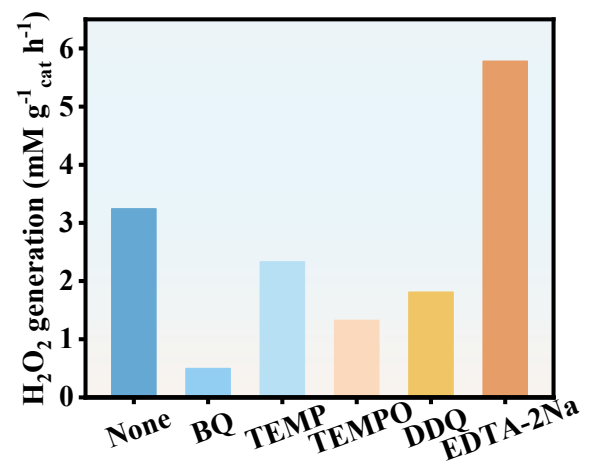

**Figure S17.** H<sub>2</sub>O<sub>2</sub> generation performance of free radical trapping experiment of simultaneous reaction without the addition of alcohol.

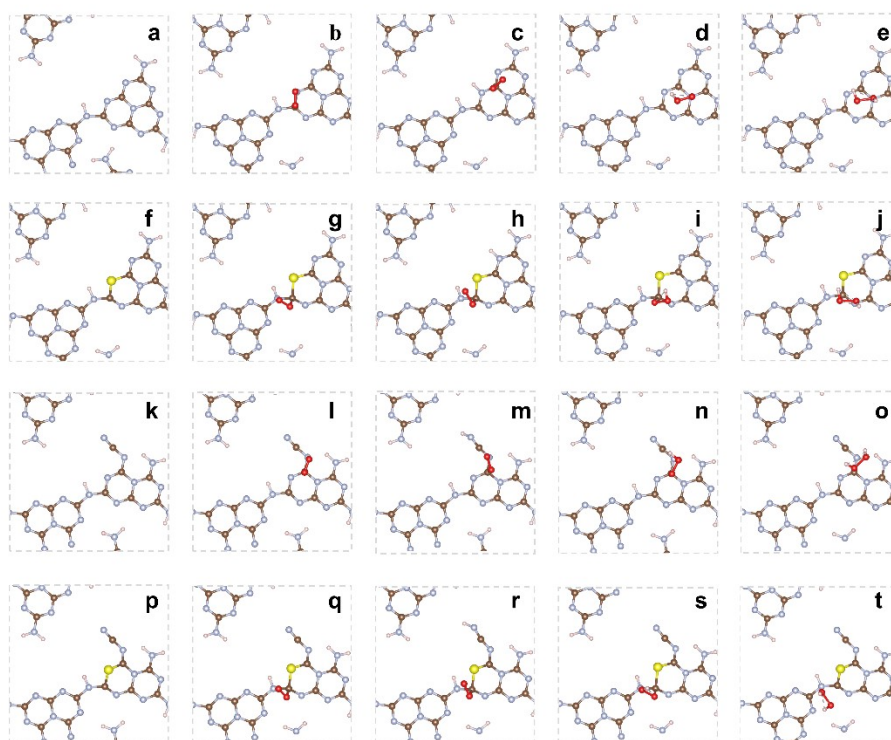

**Figure S18.** The activation process of defect modified  $C_3N_4$ , (a-e) CN, (f-j) S- $C_3N_4$ , (k-o) CN- $C_3N_4$  and (p-t) MTCN: a, f, k and p are the models of CN, S- $C_3N_4$ , CN- $C_3N_4$  and MTCN, respectively; a-e, f-j, k-o and p-t represent the  $O_2$  activation and ORR  $H_2O_2$  generation reaction process on each model.

**Table S1.** BET specific surface areas ( $\text{m}^2 \text{g}^{-1}$ ) of CN, MCN, TCN and MTCN.

| Samples                                      | CN       | MCN      | TCN      | MTCN    |
|----------------------------------------------|----------|----------|----------|---------|
| BET surface area ( $\text{m}^2/\text{g}$ )   | 10.0189  | 1.9074   | 0.1555   | 0.4434  |
| Average Pore diameter (nm)                   | 29.9984  | 50.4241  | 76.2079  | 30.8653 |
| Total pore volume ( $\text{cm}^3/\text{g}$ ) | 0.02248  | 0.01617  | 0.00184  | 0.00243 |
| Micropore volume ( $\text{cm}^3/\text{g}$ )  | 0.001117 | 0.000689 | 0.000181 | 0       |

**Table S2.** The wavelength-dependent AQY for photocatalytic H<sub>2</sub>O<sub>2</sub> generation by MTCN. Conditions: 10% EtOH, pH=7, 0.5 g L<sup>-1</sup> catalyst.

| Wavelength (nm)                                 | 365    | 420    | 475   | 520   |
|-------------------------------------------------|--------|--------|-------|-------|
| H <sub>2</sub> O <sub>2</sub> generation (μmol) | 46.436 | 44.282 | 0.903 | 0.727 |
| Light intensity (mW cm <sup>-2</sup> )          | 13.12  | 14.3   | 11.2  | 14.8  |
| Irradiation area (cm <sup>2</sup> )             | 42.99  | 42.99  | 42.99 | 42.99 |
| Irradiation time (h)                            | 1      | 1      | 1     | 1     |
| AQY (%)                                         | 64.46  | 49.01  | 1.12  | 0.62  |



**Table S3.** Photocatalytic H<sub>2</sub>O<sub>2</sub> generation rate and experimental conditions of some other reported g-C<sub>3</sub>N<sub>4</sub>-based samples.

| Catalysts                                          | Sacrificial reagent  | Light Source                      | H <sub>2</sub> O <sub>2</sub> yield<br>(mM g <sup>-1</sup> h <sup>-1</sup> ) | Reference        |
|----------------------------------------------------|----------------------|-----------------------------------|------------------------------------------------------------------------------|------------------|
| <b>MTCN</b>                                        | <b>ethanol (10%)</b> | <b>300 W Xe lamp (&gt;420 nm)</b> | <b>10.778</b>                                                                | <b>This work</b> |
| g-C <sub>3</sub> N <sub>4</sub>                    | ethanol (90%)        | 2 kW Xe lamp (>420 nm)            | 0.492                                                                        | 8                |
| g-C <sub>3</sub> N <sub>4</sub> /PDI <sub>51</sub> | isopropanol (90%)    | 2 kW Xe lamp (>420 nm)            | 0.699                                                                        | 9                |
| KTTCN                                              | isopropanol (0.5%)   | 300 W Xe lamp (>420 nm)           | 0.72                                                                         | 10               |
| N <sub>v</sub> -C <sub>3</sub> N <sub>4</sub>      | methanol (5%)        | 300 W Xe lamp (>420 nm)           | 1.01                                                                         | 11               |
| AKCN                                               | ethanol (10%)        | 300 W Xe lamp (>420 nm)           | 2.666                                                                        | 12               |
| AKMT                                               | ethanol (10%)        | 300 W Xe lamp (>420 nm)           | 3.4                                                                          | 13               |
| CNS-500                                            | isopropanol (10%)    | 300 W Xe lamp (>420 nm)           | 4.978                                                                        | 14               |
| TP-PCN                                             | isopropanol (10%)    | 300 W Xe lamp (>420 nm)           | 6.53                                                                         | 15               |

**Table S4.** TRPL data of CN and MTCN.

| Samples | $\tau_1$ (ns) | $A_1$      | $\tau_2$ (ns) | $A_2$     | $\tau_A$ (ns) <sup>a</sup> |
|---------|---------------|------------|---------------|-----------|----------------------------|
| CN      | 0.64616       | 5201.62893 | 0.64611       | 483.33354 | 0.646155749                |
| MTCN    | 0.64539       | 4917.0088  | 0.64537       | 702.58572 | 0.6453875                  |

<sup>a</sup> The calculation formula of the average TRPL lifetime is:  $\tau_A = \frac{\sum A_i \tau_i^2}{\sum A_i \tau_i}$ , where  $\tau_i$  is the time coefficient and  $A_i$  is the corresponding amplitude of each component.

## References

- 1 G. Kresse, J. Furthmüller, *Comput. Mater. Sci.*, 1996, **6**, 15-50.
- 2 P.E. Blöchl, *Phys. Rev. B*, 1994, **50**, 17953-17979.
- 3 J.P. Perdew, K. Burke, M. Ernzerhof, *Phys. Rev. Lett.*, 1996, **77**, 3865-3868.
- 4 S.L. Dudarev, G.A. Botton, S.Y. Savrasov, C.J. Humphreys, A.P. Sutton, *Phys. Rev. B*, 1998, **57**, 1505-1509.
- 5 S. Grimme, S. Ehrlich, L. Goerigk, *J. Comput. Chem.*, 2011, **32**, 1456-1465.
- 6 H. Yu, R. Shi, Y. Zhao, T. Bian, Y. Zhao, C. Zhou, G.I.N. Waterhouse, L.-Z. Wu, C.-H. Tung, T. Zhang, *Adv. Mater.*, 2017, **29**, 1605148.
- 7 Y.-W. Li, S.-Z. Li, L.-Y. Liu, Z.-F. Zhang, W.-L. Ma, *Appl. Catal. B: Environ.*, 2023, **321**, 122025.
- 8 Y. Shiraishi, S. Kanazawa, Y. Sugano, D. Tsukamoto, H. Sakamoto, S. Ichikawa, T. Hirai, *ACS Catal.*, 2014, **4**, 774-780.
- 9 Y. Shiraishi, S. Kanazawa, Y. Kofuji, H. Sakamoto, S. Ichikawa, S. Tanaka, T. Hirai, *Angew. Chem. Int. Ed.*, 2014, **53**, 13454-13459.
- 10 J. Zhang, C. Yu, J. Lang, Y. Zhou, B. Zhou, Y.H. Hu, M. Long, *Appl. Catal., B*, 2020, **277**, 119225.
- 11 Y. Wang, D. Meng, X. Zhao, *Appl. Catal. B: Environ.*, 2020, **273**, 119064.
- 12 P. Zhang, D. Sun, A. Cho, S. Weon, S. Lee, J. Lee, J.W. Han, D.-P. Kim, W. Choi, *Nat. Commun.*, 2019, **10**, 940.
- 13 P. Zhang, Y. Tong, Y. Liu, J.J.M. Vequizo, H. Sun, C. Yang, A. Yamakata, F. Fan, W. Lin, X. Wang, W. Choi, *Angew. Chem. Int. Ed.*, 2020, **59**, 16209-16217.
- 14 L.-L. Liu, F. Chen, J.-H. Wu, M.-K. Ke, C. Cui, J.-J. Chen, H.-Q. Yu, *Appl. Catal. B: Environ.*, 2022, **302**, 120845.
- 15 H. Che, X. Gao, J. Chen, J. Hou, Y. Ao, P. Wang, *Angew. Chem. Int. Ed.*, 2021, **60**, 25546-25550.
